# Supplementary material for: General Anesthetic Agents and Renal Function after Nephrectomy
Source: J Clin Med. 2019 Sep 24;8(10):1530. doi: 10.3390/jcm8101530 (PMC6832234; doi:10.3390/jcm8101530)

# General anesthetic agents and renal function after nephrectomy

## : Supplemental Materials

| Number                         | Title                                                                                                                                                                                                                                  | Page |
|--------------------------------|----------------------------------------------------------------------------------------------------------------------------------------------------------------------------------------------------------------------------------------|------|
| <b>Supplemental Table S1.</b>  | Comparison of incidence of primary and secondary outcomes between patients according to the main anesthetic agents (propofol vs. volatile agents) during surgery before and after propensity score matching.                           | 2    |
| <b>Supplemental Table S2.</b>  | Comparison of incidence of primary and secondary outcomes between patients according to the main anesthetic agents (propofol vs. volatile agents) before and after propensity score matching in the subgroup of partial nephrectomy.   | 3    |
| <b>Supplemental Figure S1.</b> | Histograms (left) and covariate balance plot (right) of distribution of standardized differences of covariates between the patients who received propofol and sevoflurane during surgery in all cohort.                                | 4    |
| <b>Supplemental Figure S2.</b> | Histograms (left) and covariate balance plot (right) of distribution of standardized differences of covariates between the patients who received propofol and desflurane during surgery in all cohort.                                 | 5    |
| <b>Supplemental Figure S3.</b> | Histograms (left) and covariate balance plot (right) of distribution of standardized differences of covariates between the patients who received sevoflurane and desflurane during surgery in all cohort.                              | 6    |
| <b>Supplemental Figure S4.</b> | Histograms (left) and covariate balance plot (right) of distribution of standardized differences of covariates between the patients who received propofol and volatile agents during surgery in all cohort.                            | 7    |
| <b>Supplemental Figure S5.</b> | Kaplan-Meier survival curve analysis of new-onset chronic kidney disease according to the main anesthetic agents (TIVA vs. volatile agents) before (A) and after (B) propensity score matching in all cohort.                          | 8    |
| <b>Supplemental Figure S6.</b> | Histograms (left) and covariate balance plot (right) of distribution of standardized differences of covariates between the patients who received propofol and volatile agents during surgery in the subgroup of partial nephrectomy.   | 9    |
| <b>Supplemental Figure S7.</b> | Kaplan-Meier survival curve analysis of new-onset chronic kidney disease according to the main anesthetic agents (TIVA vs. volatile agents) before (A) and after (B) propensity score matching in the subgroup of partial nephrectomy. | 10   |

**Supplemental Table S1.** Comparison of incidence of primary and secondary outcomes between patients according to the main anesthetic agents (propofol vs. volatile agents) during surgery before and after propensity score matching.

| Outcomes                                | Propofol  | Volatile agents | Risk difference, % | P-value |
|-----------------------------------------|-----------|-----------------|--------------------|---------|
| Number of patients before matching      | 130       | 957             |                    |         |
| Postoperative AKI, n                    | 29 (22.3) | 342 (35.7)      | -13 (-6 to -21)    | 0.002   |
| Stage 1                                 | 24 (18.5) | 303 (31.7)      | -13 (-6 to -20)    |         |
| Stage 2                                 | 1 (0.8)   | 5 (0.5)         | 0.2 (-1.3 to 1.8)  |         |
| Stage 3                                 | 4 (3.1)   | 34 (3.6)        | -0.5 (-3.7 to 2.7) |         |
| Postoperative new-onset CKD stage 3a, n | 33 (25.4) | 427 (44.6)      | -19 (-11 to -27)   | <0.001  |
| CKD upstaging, n                        | 38 (29.2) | 448 (46.8)      | -18 (-9 to -26)    | <0.001  |
| Number of patients after matching       | 126       | 126             |                    |         |
| Postoperative AKI, n                    | 27 (21.4) | 43 (34.1)       | -13 (-2 to -24)    | 0.024   |
| Stage 1                                 | 23 (18.3) | 41 (32.5)       | -14 (-4 to -25)    |         |
| Stage 2                                 | 1 (0.8)   | -               | -                  |         |
| Stage 3                                 | 3 (2.4)   | 2 (1.6)         | 0.8 (-3.2 to 4.0)  |         |
| Postoperative new-onset CKD stage 3a, n | 32 (25.4) | 44 (34.9)       | -10 (-21 to 2)     | 0.100   |
| CKD upstaging, n                        | 36 (28.6) | 69 (54.8)       | -26 (-38 to -14)   | <0.001  |

The values are presented as the median (interquartile range) or number (%).

AKI = acute kidney injury determined by KDIGO creatinine criteria, CKD = chronic kidney disease.

**Supplemental Table S2.** Comparison of incidence of primary and secondary outcomes between patients according to the main anesthetic agents (propofol vs. volatile agents) before and after propensity score matching in the subgroup of partial nephrectomy.

| Outcomes                                | Propofol  | Volatile agents | Risk difference, %    | P-value |
|-----------------------------------------|-----------|-----------------|-----------------------|---------|
| Number of patients before matching      | 86        | 532             |                       |         |
| Postoperative AKI, n                    | 13 (15.1) | 86 (16.2)       | -10.5 (-9.2 to 7.1)   | 0.806   |
| Stage 1                                 | 9 (10.5)  | 80 (15.0)       | -4.6 (-11.7 to 2.6)   |         |
| Stage 2                                 | 1 (1.2)   | 2 (0.4)         | 0.8 (-1.5 to 3.1)     |         |
| Stage 3                                 | 3 (3.5)   | 4 (0.8)         | 2.7 (-1.2 to 6.7)     |         |
| Postoperative new-onset CKD stage 3a, n | 15 (17.4) | 121 (22.7)      | -5.3 (-14.1 to 3.5)   | 0.271   |
| CKD upstaging, n                        | 29 (33.7) | 246 (46.2)      | -12.5 (-1.7 to 23.4)  | 0.030   |
| Number of patients after matching       | 67        | 67              |                       |         |
| Postoperative AKI, n                    | 12 (17.9) | 14 (20.9)       | -3.0 (-16.4 to 10.4)  | 0.663   |
| Stage 1                                 | 8 (11.9)  | 12 (17.8)       | -6.0 (-18.0 to 6.1)   |         |
| Stage 2                                 | 1 (1.5)   | 1 (1.5)         | 0.0 (-4.1 to 4.1)     |         |
| Stage 3                                 | 3 (4.5)   | 2 (1.5)         | 1.5 (-5.0 to 7.9)     |         |
| Postoperative new-onset CKD stage 3a, n | 12 (17.9) | 15 (22.4)       | -4.5 (-18.0 to 9.1)   | 0.520   |
| CKD upstaging, n                        | 25 (37.3) | 37 (55.2)       | -17.9 (-34.5 to -1.3) | 0.038   |

The values are presented as the median (interquartile range) or number (%).

AKI = acute kidney injury determined by KDIGO creatinine criteria, CKD = chronic kidney disease.

**Supplemental Figure S1.** Histograms (left) and covariate balance plot (right) of distribution of standardized differences of covariates between the patients who received propofol and sevoflurane during surgery in all cohort. BMI = body-mass index, ASA\_class = American Society of Anesthesiologist physical status classification, HTN = hypertension, DM = diabetes mellitus, CVA = cerebrovascular accident, Hb = hemoglobin, Alb = albumin, GFR = glomerular filtration rate, pRBC = packed red blood cells.

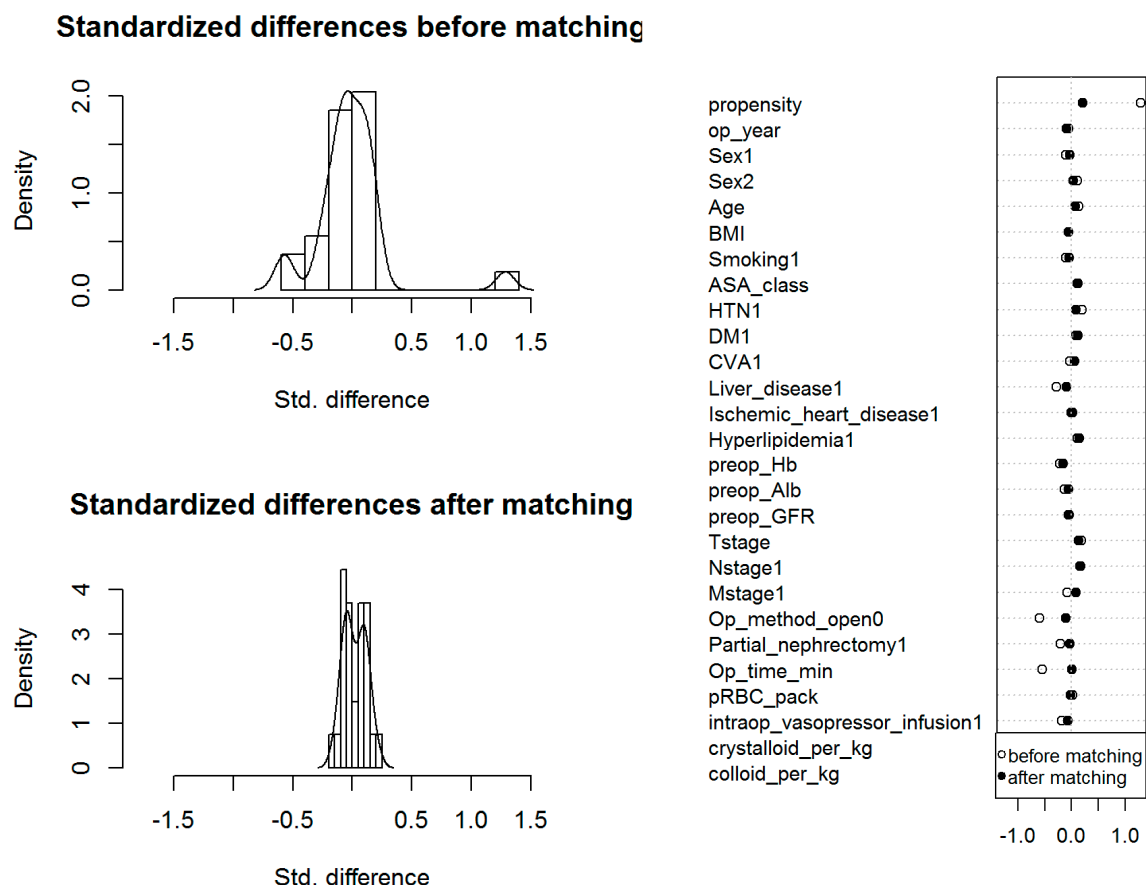

**Supplemental Figure S2.** Histograms (left) and covariate balance plot (right) of distribution of standardized differences of covariates between the patients who received propofol and desflurane during surgery in all cohort. BMI = body-mass index, ASA\_class = American Society of Anesthesiologist physical status classification, HTN = hypertension, DM = diabetes mellitus, CVA = cerebrovascular accident, Hb = hemoglobin, Alb = albumin, GFR = glomerular filtration rate, pRBC = packed red blood cells.

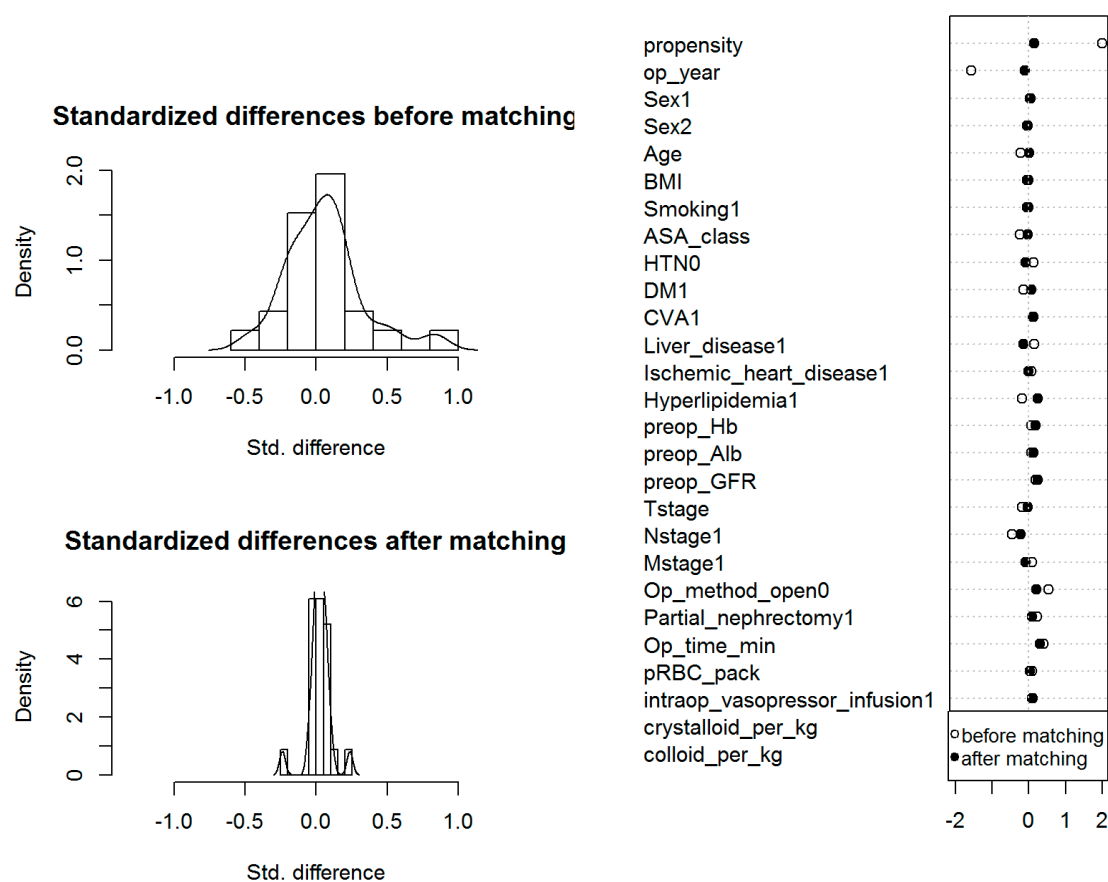

**Supplemental Figure S3.** Histograms (left) and covariate balance plot (right) of distribution of standardized differences of covariates between the patients who received sevoflurane and desflurane during surgery in all cohort. BMI = body-mass index, ASA\_class = American Society of Anesthesiologist physical status classification, HTN = hypertension, DM = diabetes mellitus, CVA = cerebrovascular accident, Hb = hemoglobin, Alb = albumin, GFR = glomerular filtration rate, pRBC = packed red blood cells.

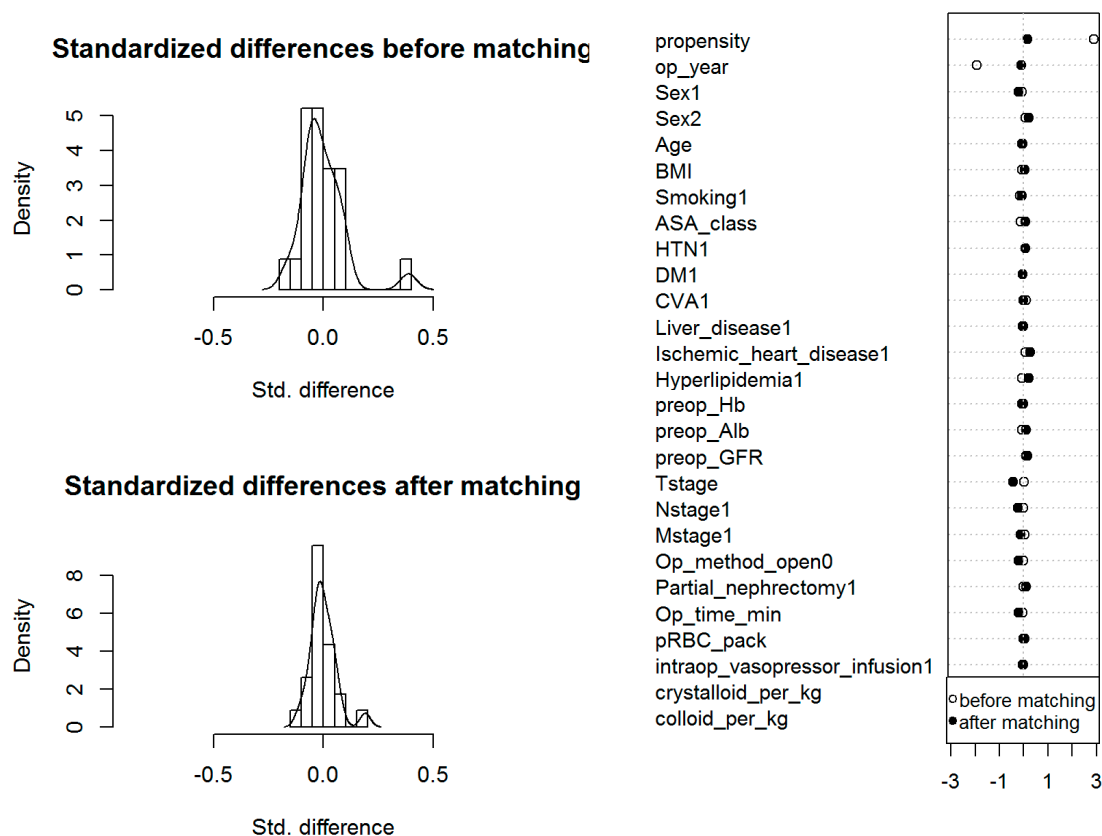

**Supplemental Figure S4.** Histograms (left) and covariate balance plot (right) of distribution of standardized differences of covariates between the patients who received propofol and volatile agents during surgery in all cohort. BMI = body-mass index, ASA\_class = American Society of Anesthesiologist physical status classification, HTN = hypertension, DM = diabetes mellitus, CVA = cerebrovascular accident, Hb = hemoglobin, Alb = albumin, GFR = glomerular filtration rate, pRBC = packed red blood cells.

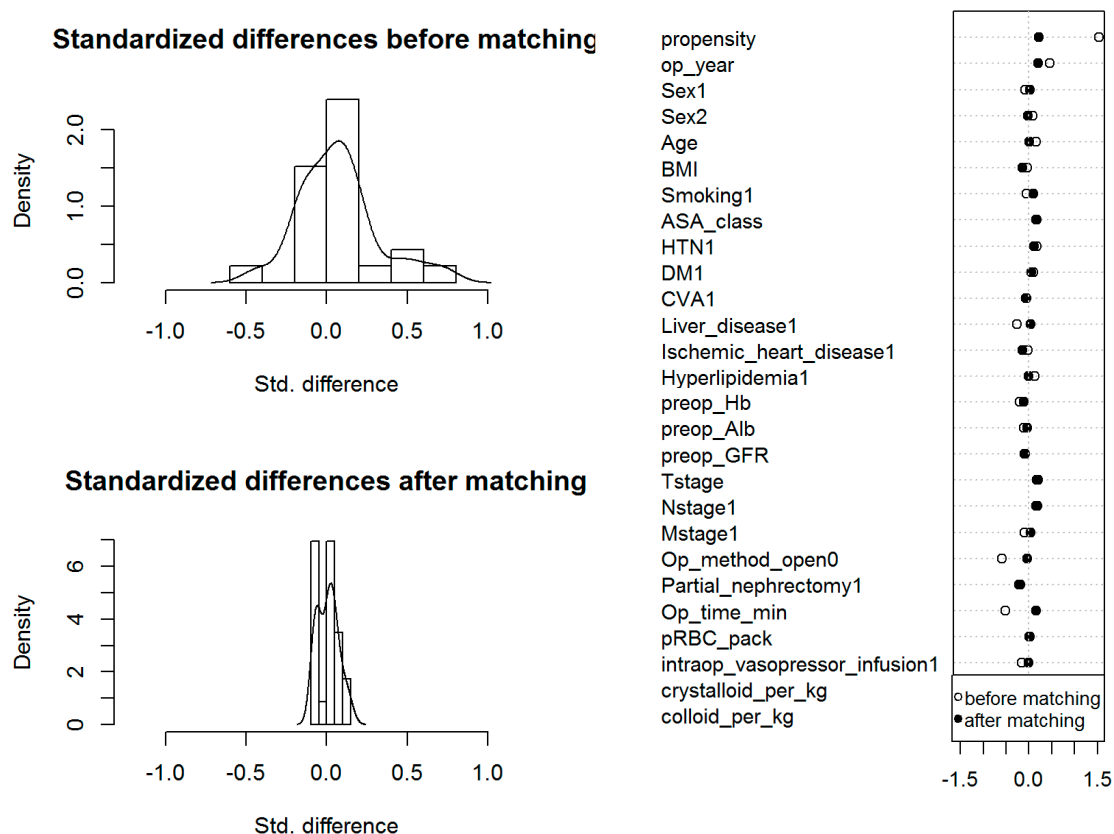

**Supplemental Figure S5.** Kaplan-Meier survival curve analysis of new-onset chronic kidney disease according to the main anesthetic agents (TIVA vs. inhalation agents) before (A) and after (B) propensity score matching in all cohort. The results of log-rank test between the groups are shown on the figure.

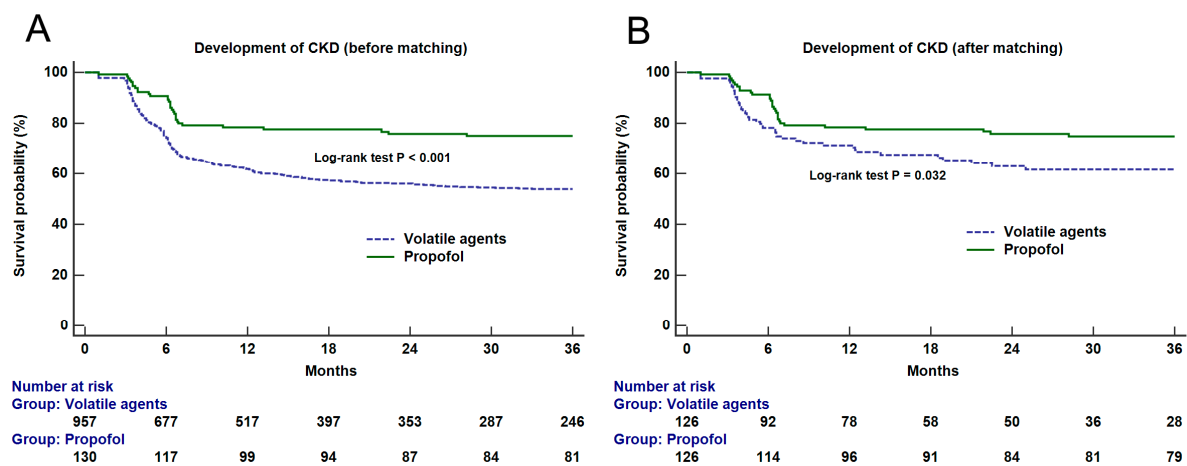

**Supplemental Figure S6.** Histograms (left) and covariate balance plot (right) of distribution of standardized differences of covariates between the patients who received propofol and volatile agents during surgery in the subgroup of partial nephrectomy. BMI = body-mass index, ASA\_class = American Society of Anesthesiologist physical status classification, HTN = hypertension, DM = diabetes mellitus, CVA = cerebrovascular accident, Hb = hemoglobin, Alb = albumin, GFR = glomerular filtration rate, pRBC = packed red blood cells.

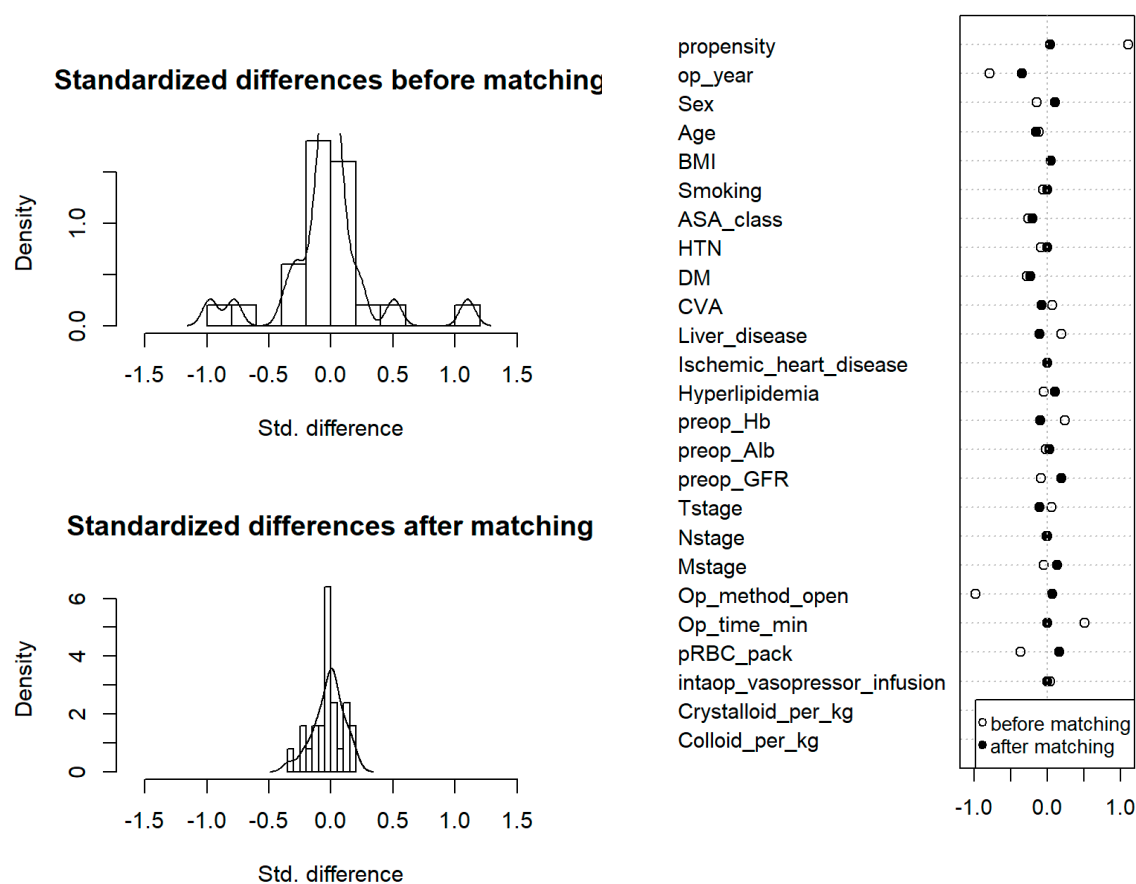

**Supplemental Figure S7.** Kaplan-Meier survival curve analysis of new-onset chronic kidney disease according to the main anesthetic agents (TIVA vs. inhalation agents) before (A) and after (B) propensity score matching in the subgroup of partial nephrectomy. The results of log-rank test between the groups are shown on the figure.

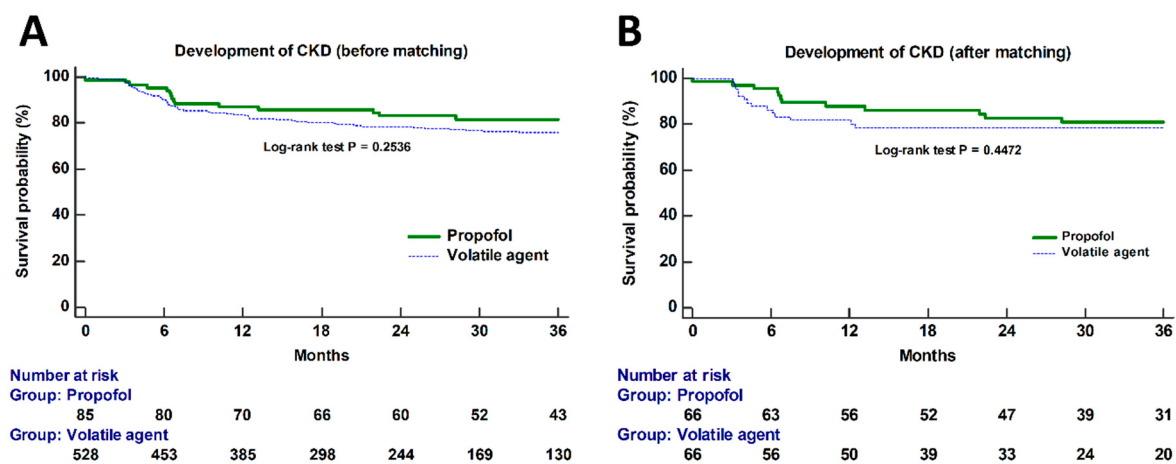

Supplement: Supplementary file 1 [file jcm-08-01530-s001.pdf]
